# Supplementary material
Source: PubMed Central journal article supplement (PMC6668018)

# Supplement Figure S1

Yong Zhang *et al*

**A.** Concentration-dependent reduction of number of adherent LNCaP cells exposed to increasing concentrations of bufalin for 96 h.

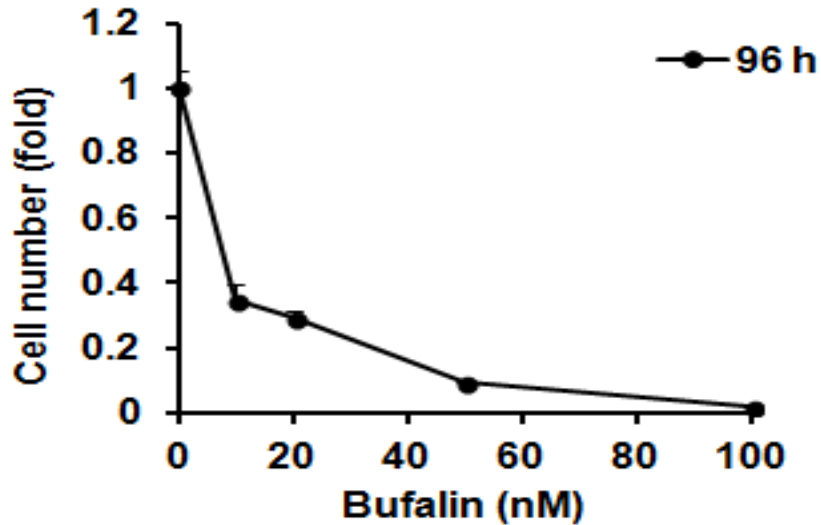

**B.** Representative photomicrograph of LNCaP cells exposed to bufalin at 2 concentrations for 48 h.

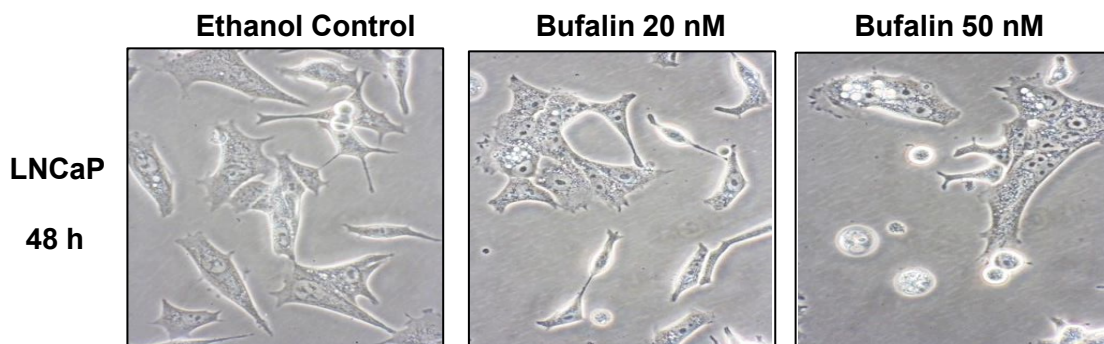

**A**, Western blot detection of c-PARP, AR, PSA in LNCaP cells exposed to bufalin for 48 h.

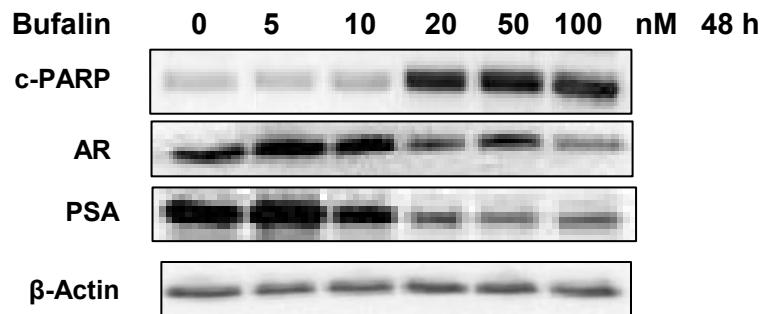

**B**, Western blot detection of c-PARP, AR, PSA in LNCaP cells exposed to bufalin for 24 h.

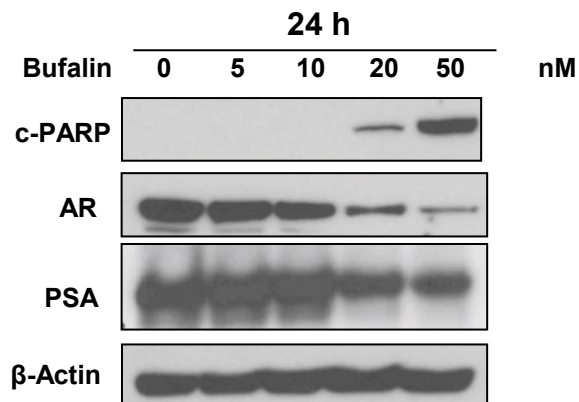

## Supplement Figure S3

Yong Zhang *et al*

Gross appearance of paraffin embedded tumors (3<sup>rd</sup>-8<sup>th</sup> ranked for each group) selected for biomarker analyses.

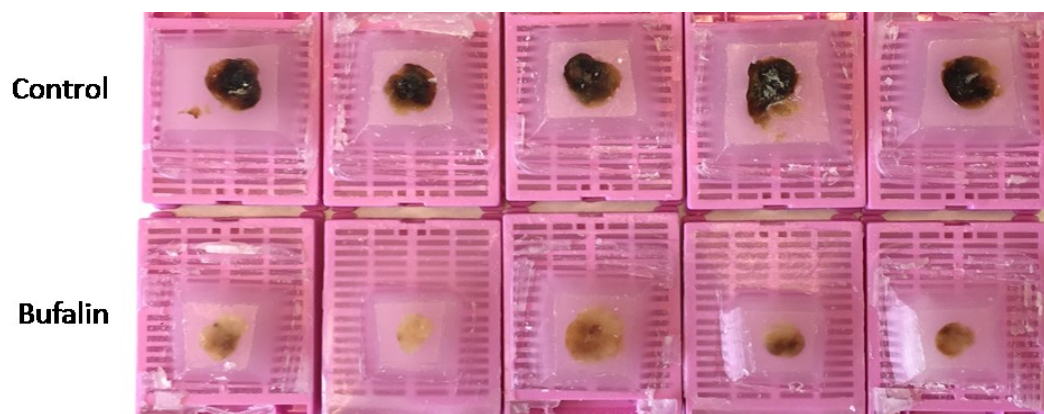



**Supplement Figure S5**

Yong Zhang *et al*

Schematic integration of bufalin induced cellular effects to inhibit LNCaP prostate tumor growth.

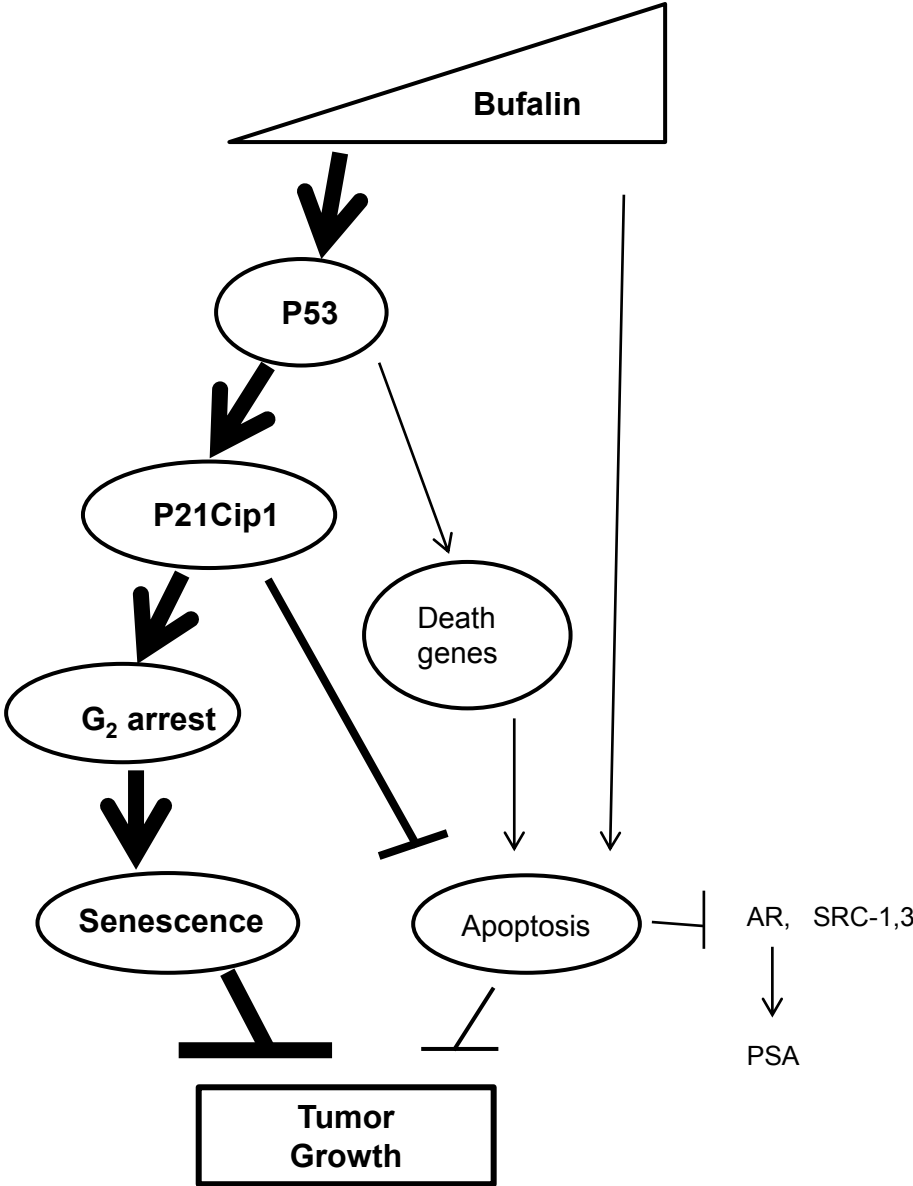

Supplement: NIHMS1505399-supplement-4.pdf [file NIHMS1505399-supplement-4.pdf]
